# Supplementary material for: The Integrated Study on the Chemical Profiling to Explore the Constituents and Mechanism of Traditional Chinese Medicine Preparation Huatuo Jiuxin Pills Based on UPLC-Q-TOF/MSE and Network Pharmacology
Source: Front Mol Biosci. 2022 Mar 31;9:818285. doi: 10.3389/fmolb.2022.818285 (PMC9008511; doi:10.3389/fmolb.2022.818285)
Supplement: Supplementary file 2 [file Table1.xlsx]

## Sheet: Sheet1
Description	Formula
Borneol oil	C10H18O
DL-Isoborneol	C10H18O
Camphor	C10H16O
Humulene	C15H24
β-Elemene	C15H24
Caryophyllene	C15H24
Oleanolic acid	C30H48O3
Alphitolic acid	C30H48O4
Asiatic acid	C30H48O5
Dipterocarpol	C30H50O2
Dryobalanone	C30H50O3
Erythrodiol	C30H50O2
gamabufotalin	C24H34O5
gamabufotalin-3-hydrogen suberate	C32H46O8
cinobufotalin	C26H34O7
ergosterol	C28H44O
telocinobufagin	C24H34O5
arenobufagin	C25H34O5
epinephrine	C9H13NO3
marinobufagin	C24H32O5
resibufogenin	C24H32O4
resibufagin	C24H30O5
dehydrobufotenine	C12H14N2O
5-hydroxytryptamine	C10H12N2O
7α-hydroxycholesterol	C27H46O2
7β-hydroxycholesterol	C27H46O2
bufotalidin	C24H32O6
bufotalin	C26H36O6
bufaian-3-suberylarginate	C38H58N4O8
bufalin	C24H34O4
bufalin sulfate	C24H34O7S
bufotenine	C12H16N2O
bufotenidine	C13H18N2O
bufothionine	C12H15N2O3S
1β-hydroxybufalin	C24H34O5
19-oxobufalin	C24H32O5
7β-Hydroxybufalin	C24H34O5
19-Hydroxybufalin	C24H34O5
12β-Hydroxybufalin	C24H34O5
Gamabufagin	C24H34O5
Desacetylcinobufotalin	C24H32O6
5β-Hydroxybufotalin	C26H36O7
3,5,14,19-Tetrahydroxybufa-20,22-dienolide	C24H34O6
3β-Formyloxyresibufogenin	C25H32O5
(3β,5β,15β,17ξ)-3-Hydroxy-19-oxo-14,15-epoxybufa-20,22-dienolide	C24H30O5
(3β,5β,15β)-3-Hydroxy-19-oxo-14,15-epoxybufa-20,22-dienolide	C24H30O5
(3β,9ξ,15β)-3-Hydroxy-19-oxo-14,15-epoxybufa-20,22-dienolide	C24H30O5
resibufaginol	C24H32O5
Cinobufagin	C26H34O6
19-Oxocinobufagin	C26H32O7
Desacetylcinobufagin	C24H32O5
Desacetylcinobufaginol	C24H32O6
19-oxodesacetylcinobufagin-1	C24H30O6
19-oxodesacetylcinobufagin-2	C24H30O6
6α-hydroxycinobufagin	C26H34O7
12β-Hydroxycinobufagin	C26H34O7
Cinobufagin-3-hydrogen suberate	C34H46O9
19-Oxocinobufotalin	C26H32O8
Arenobufagin 3-hemisuberate	C32H44O9
Marinobufagin 3-sulfate	C24H32O8S
psi-bufarenogin	C24H32O6
Bufarenogin	C24H32O6
20R,21-epoxyresibufogenin	C24H32O5
3-O-formyl-20R，21-epoxyresibufogenin	C25H32O6
β-Sitosterol	C29H50O
N-Methylserotonin	C11H14N2O
bufobutanoic acid	C14H16N2O4
bufoserotonin-A	C11H13N3O2
bufoserotonin-B	C18H24N2O4
bufoserotonin-C	C18H19N3O3
deoxycholic acid	C24H40O4
chenode(s)oxycholic acid	C24H40O4
glucocholic acid	C26H43NO6
taurodeoxycholic acid	C26H45NO6S
glycodeoxycholic acid	C26H43NO5.H2O
taurochenodeoxycholic acid	C26H45NO6S
glycochenodeoxycholic acid	C26H43NO5
cholic acid	C24H40O5
lithocholic acid	C24H40O3
urea	CH4N2O
cholanic acid	C24H40O2
choline	C5H14NO(+)
sphingomyelin	C41H84N2O6P
lysolecithin	C24H50NO7P
lysophosphatidyl choline	C9H21NO8P
bilirubin	C33H36N4O6
cholesterol	C27H46O
sodium taurocholate	C26H44NNaO7S
tauroursodeoxycholate	C26H44NO6S-
tauroursodeoxycholic acid sodium salt	C26H44NNaO6S
sodium glycocholate	C26H42NNaO6
taurocholic acid sodium salt hydrate	C26H46NNaO8S
glycine sodium hyodeoxycholate	C26H44NNaO6
galcium phosphate	Ca3O8P2
calcium phosphate	Ca3O8P2
iron(iii) phosphate dihydrate	H4FeO6P
taurine	C2H7NO3S
glycine	C2H5NO2
Aspartic acid	C4H7NO4
Glutamic acid	C5H9NO4
Cysteine	C3H7NO2S
phenprobamate	C10H13NO2
Isoleucine	C6H13NO2
Tyrosine	C9H11NO3
Valine	C5H11NO2
Leucine	C6H13NO2
taurohyodeoxycholic acid sodium salt	C26H44NNaO6S
Glycoursodeoxycholic acid	C26H43NO5
hyodeoxycholic acid	C24H40O4
N-[(3a,5b)-3-hydroxy-24-oxocholan-24-yl]-(9CI) Glycine	C26H43NO4
taurolithocholic acid sodium salt	C26H44NNaO5S
trilaurin	C39H74O6
L-1-Phosphatidylethanolamine	C40H80NO8P
acetylpanaxydol	C19H26O3
Ginsenoside Ro	C48H76O19
Ginsenoside Ra1	C58H98O26
Ginsenoside Ra2	C58H98O26
Ginsenoside Ra3	C59H100O27
ginsenoside Rb1	C54H92O23
ginsenoside Rb2	C53H90O22
ginsenoside Rb3	C54H92O23
ginsenoside Rg1	C42H72O14
ginsenoside Rg2	C42H72O13
ginsenoside Rg3	C42H72O13
ginsenoside Rg4-1	C42H70O12
ginsenoside Rg4-2	C42H70O12
ginsenoside Rg5	C41H68O12
ginsenoside Rg6	C41H68O12
ginsenoside Rg8	C41H68O14
Ginsenoside Re	C48H82O18
Ginsenoside Rf	C42H72O14
Ginsenoside Rh1	C36H62O9
Ginsenoside Rh2	C36H62O8
Ginsenoside Rh3	C36H60O7
Ginsenoside Rh4	C36H60O8
Ginsenoside Rh5	C37H64O9
Ginsenoside Rh7	C36H60O9
Ginsenoside Rh8	C36H60O9
20-glucoginsenoside Rf	C48H82O19
Notoginsenoside R1	C47H80O18
Pseudoginsenoside F11	C42H72O14
Pseudoginsenoside RT1	C47H74O18
Pseudoginsenoside RT5	C36H62O10
Pseudoginsenoside D	C54H92O23
20(S)-Protopanaxadiol	C30H52O3
20(S)-protopanaxadiol saponins	C36H62O8
protopanaxadiol	C30H52O3
panaxynol	C17H24O
ginsenoyne A	C17H22O2
Ginsenoyne A linoleate	C35H52O3
ginsenoyne B	C17H23ClO2
Ginsenoyne C	C17H24O3
Ginsenoyne D	C17H26O2
Ginsenoyne E	C17H22O2
Ginsenoyne F	C19H24O3
Ginsenoyne G	C19H28O3
Ginsenoyne H	C19H26O3
Ginsenoyne I	C17H26O2
Ginsenoyne J	C17H26O
Ginsenoyne K	C17H24O3
Ginsenoyne L	C32H46O2
Ginsenoyne M	C32H46O2
Ginsenoyne N	C32H46O2
Aromadendrene	C15H24
germacrene B	C15H24
isocaryo-phyllene	C15H24
(-)-α-Neoclovene	C15H24
γ-Muurolene	C15H24
Panasinsanol A	C15H26O
Panasinsanol B	C15H26O
ginsenol	C15H26O
eicosenoic acid	C20H38O2
malic acid	C4H6O5
Succinic acid	C4H6O4
Oleic acid	C18H34O2
Linoleic acid	C18H32O2
Linolenic acid	C18H30O2
palmitoleic acid	C16H30O2
Palmitic acid	C16H32O2
palmitin	C51H98O6
linolein	C57H98O6
3-Phenylpropionic acid	C9H10O2
4-Hydroxyphenylacetic acid	C8H8O3
Azelaic acid	C9H16O4
Cinnamic acid	C9H8O2
4-Hydroxycinnamic acid	C9H8O3
Ferulic Acid	C10H10O4
Caffeic acid	C9H8O4
campesterol	C28H48O
daucosterol	C35H60O6
2,6-di-tert-butylhydroquinone	C14H22O2
β-caryophyllene	C15H24
caryophellene	C15H24
caryophyllene alcohol	C15H26O
1,8-heptadecadiene-4,6-diyne-3,10-diol	C17H24O2
1-Heptadecene-4,6-diyne-3,9-diol	C17H26O2
a-Panose	C18H32O16
Ginsenoside Rs1	C55H92O23
Ginsenoside Rs2	C55H92O23
panaxydol chlorohydrine	C17H25ClO2
notoginsenoside R4	C59H100O27
perlolyrine	C16H12N2O2
β-patchoulene	C15H24
γ-patchoulene	C15H24
Maleic acid	C4H4O4
widdrol	C15H26O
D(+)-Xylose	C5H10O5
gomisin A	C23H28O7
Salicylic acid	C7H6O3
bicyclogermacrene	C15H24
D-Mannose	C6H12O6
β-gurjunene	C15H24
γ-gurjunene	C15H24
5-Methoxybenzofuran	C9H8O2
N9-formylharman	C13H12N2O
galactose	C20H31N3O11
galacturonic acid	C18H26O19
Quinquenoside R1	C56H94O24
Fumaric acid	C4H4O4
piperonal	C8H6O3
α-muurolene	C15H24
mayurone	C14H20O
maltol	C6H6O3
Dianthoside	C12H16O8
Maltose	C12H22O11
Selina-4(15),7(11)-diene	C15H24
α-selinene	C15H24
β-selinene	C15H24
Eleutheroside A	C35H60O6
eremophilene	C15H24
Sitoindoside II	C53H92O7
L-Glutamic acid	C5H9NO4
Lecithin	C42H80NO8P
arabinose	C5H10O5
fructose	C6H12O6
β-farnesene	C15H24
α-cubebene	C15H24
α-cadinene	C15H24
citric acid	C6H8O7
4,10-Aromadendranediol	C15H26O2
α-curcumene	C15H22
N-stearoylsphingomyelin	C41H83N2O6P
γ-aminobutyric acid	C4H9NO2
Nicotinic acid	C6H5NO2
Tartaric acid	C4H6O6
β-bisabolene	C15H24
proline	C5H9NO2
α-humulene	C15H24
D-glucose	C6H12O6
raffinose	C18H32O16
pyroglutamic acid	C5H7NO3
α-Elemene	C15H24
lysine	C6H14N2O2
rhamnose	C6H14O6
β-guaiene	C15H24
Adenosine	C10H13N5O4
β-neoclovene	C15H24
Neointermedeol	C15H26O
Sucrose	C12H22O11
β-maaliene	C15H24
α-santalene	C15H24
β-santalene	C15H24
α-santalol	C15H24O
Glycerophosphoric acid	C3H9O6P
Phosphatidylserine	C42H82NO10P
Propargyl alcohol propoxylate	C6H10O2
panose	C18H32O16
gomisin D	C28H34O10
Gomisin E	C28H34O9
Gomisin H	C23H30O7
Gomisin J	C22H28O6
Gomisin N	C23H28O6
malonylginsenoside Rb2	C56H92O25
1,3-dipalmitin	C35H68O5
Loxanol V	C14H30O
Pisol	C12H26O
Methyl myristate	C15H30O2
pentadecylic acid	C15H30O2
methyl linoleate	C19H34O2
2,6-dimethyl-3,7-octadiene-2,6-diol	C10H18O2
malonic acid	C3H4O4
Methyl stearate	C19H38O2
Methyl palmitelaidate	C17H32O2
Methyl pentadecanoate	C16H32O2
Dauricine (8CI)	C38H44N2O6
neocnidilide	C12H18O2
octane	C8H18
Kaempferol-3-arabofuranoside	C20H18O10
α-Guaiene	C15H24
Campesteryl ferulate	C38H56O4
Elemicin	C12H16O3
Diisooctyl phthalate	C24H38O4
Inermin	C16H12O5
Folinic acid	C20H23N7O7
methyl (Z)-icos-11-enoate	C21H40O2
N-Salicylidene-salicylamine	C14H13NO2
epsilon-Cadinene	C15H24
Kaempferol	C15H10O6
Humulene oxide	C15H24O
Chrysanthemaxanthin	C40H56O3
12-O-Nicotinoylisolineolone	C27H35NO6
Tridecylic acid	C13H26O2
(+)-Maalioxide	C15H26O
1-Heptadecanol	C17H36O
1-Hexadecin	C16H30
13-Tetradecen-1-ol acetate	C16H30O2
16-Oxoseratenediol	C30H48O3
Neohexane	C6H14
2,3,4-Trimethyldecane	C13H28
2,3,8-Trimethyldecane	C13H28
2,6,10,15-tetramethylheptadecane	C21H44
2-Methyltridecane	C14H30
3,4-Dimethylheptane	C9H20
3,5-Dimethyl-p-anisic acid	C10H12O3
gypsogenin-3-glucoronide	C36H54O10
3-Ethyl-3-methylheptane	C10H22
3-methylheptane	C8H18
3-methylundecane	C12H26
4-Methyldodecane	C13H28
5-Isobutylnonane	C13H28
5-(heptadec-12-enyl)resorcinol	C23H38O2
5-methyl-tetradecane	C15H32
7-(beta-Xylosyl)cephalomannine	C50H61NO18
7-Tetradecyne	C14H26
7alpha-L-Rhamnosyl-6-methoxylutcolin	C22H22O11
Nepetin	C16H12O7
Acetal	C6H14O2
Adenosine triphosphate	C10H16N5O13P3
Aposiopolamine	C16H17NO3
Araloside A	C47H74O18
Argininyl-fructosyl-glucose	C21H22O11
Celabenzine	C23H29N3O2
(R)-()-Citronellal	C10H18O
α-D-Mannopyranuronic acid	C6H10O7
Deoxyharringtonine	C28H37NO8
Dianthramine	C14H11NO6
Ditertbutyl phthalate	C16H22O4
Arachidonate	C20H32O2
Frutinone A	C16H8O4
ginsenoside La	C41H68O13
(3α,5ξ,12β,14β)-Dammar-24-ene-3,12,20-triol	C30H52O3
Gypenoside LXIX	C53H90O22
Girinimbine	C18H17NO
Schisantherin B	C28H34O9
L-erythro-isocitric acid	C6H8O7
isocitric acid	C6H8O7
malkangunin	C24H32O7
Malonylginsenoside Rc	C56H92O25
Malonylginsenoside Rd	C51H84O21
Malvalic acid	C18H32O2
Methyl tricosanoate	C24H48O2
Mycosinol	C13H10O3
N,N-Dimethyldecanamide	C12H25NO
notoginsenoside R2	C41H70O13
notoginsenoside R6	C48H82O19
Stearyl acetate	C20H40O2
Pancratistatin	C14H15NO8
Pandamine	C31H44N4O5
Ramalic acid	C18H18O7
Methylselenocysteine	C4H9NO2Se
suchilactone	C21H20O6
Vulgarin	C15H20O4
Trifolirhizin	C22H22O10
3,6-Dimethylundecane	C13H28
6-O-[Bis(diisopropylamino)acetyl]hexonic acid	C20H40N2O8
Dammarane	C30H54
Methyl margarate	C18H36O2
p-Glucosyloxymandelonitrile	C14H17NO7
Dibutyl phthalate	C16H22O4
paeonol	C9H10O3
Biliverdin	C33H36Cl2N4O6
sodium cholate	C24H39NaO5
Hyocholic acid	C24H40O5
Ursodeoxycholic acid	C24H40O4
Taurocholic acid	C26H45NO7S
3a,7a-Dihydroxycholanoic acid	C24H40O4
chenodeoxycholic acid	C24H40O4
Tauroursodeoxycholic acid	C26H45NO6S
DL-Methionine	C5H11NO2S
L-(-)-methionine	C5H11NO2S
L-Cystine	C6H12N2O4S2
Stearic acid	C18H36O2
Dehydrocholic acid	C24H34O5
Tauroursodeoxycholate acid sodium salt	C26H44NNaO6S
Sodium deoxycholate	C24H39NaO4
Sodium Glycine Hyodeoxycholate	C26H42NNaO5
Sodium taurodeoxycholate hydrate	C26H46NNaO7S
Taurodehydrocholic acid	C26H39NO7S
Murocholic acid	C24H40O4
Glycocholic Acid	C26H43NO6
Sodium glycodeoxycholate	C26H42NNaO5
Sodium taurochenodeoxycholate	C26H44NNaO6S
glycodehydrocholic acid	C26H37NO6
acetic acid	C2H4O2
heneicosane	C21H44
docosane	C22H46
tricosane	C23H48
eicosane	C20H42
2-phenyl-2-propanol	C9H12O
β-Caryophyllene	C15H24
heptadecane	C17H36
Methyl heptadecadienoate	C18H32O2
octadecane	C18H38
nonadecane	C19H40
tridecene	C13H26
pentadecane	C15H32
hexadecane	C16H34
Methyl palmitate	C17H34O2
tetradecane	C14H30
gensenoside- Rb1	C54H92O24
gensenoside- Rd	C48H82O19
ginsenoside- Re	C48H82O18
ginsenoside- Rg1	C42H72O14
ginsenoside- Rh1	C36H62O9
panaxytriol	C17H26O3
notoginsenoside- R1	C47H80O18
notoginsenoside- R2	C41H70O13
quercetin	C15H10O7
3-Nonen-2-one	C9H16O
2-nonenal	C9H16O
pelargonic acid	C9H18O2
α-gurjunene	C15H24
α-bulnesene	C15H24
1-methoxyethyl benzene	C9H12O
dencichine	C5H8N2O5
Octanoic acid	C8H16O2
cuparene	C15H22
daucosterol	C35H60O6
eleutheroside A	C35H60O6
ditertbutyl phthalate	C16H22O4
cyclododecanone	C12H22O
phenylethanone	C8H8O
enanthic acid	C7H14O2
α-copaene	C15H24
β-cubebene	C15H24
γ-cadinene	C15H24
α-cedrene	C15H24
cyperene	C15H24
gypenosideXVII	C48H82O18
20-gluco-ginsenoside Rf	C48H82O19
glucuronic acid	C6H10O7
glucuronic acid	C6H10O7
ethyl palmitate	C18H36O2
sucrose	C12H22O11
arginine	C6H14N4O2
α-cyperene	C15H24
octadecadienoic acid	C18H32O2
2,2,2-triethoxyethanol	C14H22O3
isoallylbenzene	C9H10
diisocapryl phthalate	C24H38O4
dicapryl phthalate	C24H38O4
dicapryl phthalate	C24H38O4
arabinogalactan	C20H36O14
Stigmasterol	C29H48O
(20S)-Protopanaxadiol	C30H52O3
Piceol	C8H8O2
l-picein	C14H18O7
Panaxydol	C17H24O2
panaxatriol	C30H52O4
octadecyne	C18H38
Myristic acid	C14H28O2
methyl 14-methylpentadecanoate	C17H34O2
Mandenol	C20H36O2
Lutein	C40H56O2
linolenyl alcohol	C18H32O
Lauric acid	C12H24O2
Isopulegone	C10H16O
Hypnon	C16H13N3O3
hexenal	C6H10O
hexanoic acid	C6H12O2
Hexanal	C6H12O
gypenoside ix	C47H80O17
ginsenoside Rd	C48H82O18
Ginsenoside Rc	C53H90O22
GINSENOSIDE F2	C42H72O13
Germacrene D	C15H24
Farnesol	C15H26O
dichloroaniline	C6H5Cl2N
Margaric acid	C17H34O2
Cyclooctadiene	C8H12
cadalene	C15H18
Butyl Cyclobutane	C8H16
Butylated hydroxytoluene	C15H24O
alloaromadedrene	C15H24
5-Methyl furfural	C6H6O2
3,5-Dimethoxyacetophenone	C10H12O3
3,4-Dichloroaniline	C6H5Cl2N
2,6-dimethylcyclohexanol	C8H16O
(E,E)-2,4-Heptadienal	C7H10O
2-octanone	C8H16O
2-Acetylpyrrole	C6H7NO
Spathulenol	C15H24O
Nonadecadienoic Acid	C19H34O2
10-Methylnonadecane	C20H42
1,5,8-trimethyl-1,2-dihydronaphthalene	C13H16
1-Hydroxycumene	C9H14O
[(1R)-1-Methoxyethyl]benzene	C9H12O
methyl (9Z,12E)-octadeca-9,12-dienoate	C19H34O2
γ-Caprolactone	C6H10O2
Protopanaxatriol	C30H52O4
Ginsenoside F1	C36H62O9
(1R,2S)-1-Ethyl-2-methylcyclopropane	C6H12
LEDOL	C15H26O
beta-pinene	C10H16
6,10,14-Trimethyl-2-pentadecanone	C18H36O
Heptanal	C7H14O
Valeraldehyde	C5H10O
Phenylethyl alcohol	C8H10O
Liquiritigenin	C15H12
Mequinol	C7H8O2
4-methyl-phenol	C7H8O
benzenecarboxylic acid	C7H6O2
1-Ethynylcyclododecanol	C14H24O
Normuscone	C15H28O
Muscone	C16H30O
1,15-Hexadecadiene	C16H30
n-hexadecanoic acid	C16H32O2
(1S,15S)-bicyclo[13.1.0]hexadecan-2-one	C16H28O
cis-9-hexadecenal	C16H30O
prasterone acetate	C21H30O3
Etiocholanolone	C19H30O2
androsterone /epiandrosterone	C19H30O2
dihydroandrosterone	C19H32O2
5alpha-Androstane-3alpha,17beta-diol	C19H32O2
(3β)-Cholest-5-en-3-ol	C27H46O
cholestanol	C27H48O
( 3β，5α)-cholest-7-en-3-ol	C27H46O
N,N-Diethyl-m-toluamide	C12H17NO
Muscopyridine	C16H25N
L-Aspartic acid	C4H7NO4
xylose	C5H10O5
flavoxanthin	C40H56O3
alanine	C3H7NO2
methionine	C5H11NO2S
serine	C3H7NO3
threonine	C4H9NO3
fucose	C6H12O5
histidine	C6H9N3O2
leucine	C6H13NO2
cystine	C20H24O7
tyrosine	C9H11NO3
valine	C5H11NO2
